# Supplementary material
Source: MDPI journal article supplement (https://www.mdpi.com/2075-4701/12/6/1056)
Supplement: s1 [file s1]

Supplementary Data

# Solvent Extraction for Separation of 99.9% Pure Cobalt and Recovery of Li, Ni, Fe, Cu, Al from Spent LIBs

Pratima Meshram <sup>1,\*</sup>, Sami Virolainen <sup>2</sup>, Abhilash <sup>1</sup> and Tuomo Sainio <sup>2</sup>

<sup>1</sup> CSIR-National Metallurgical Laboratory, Jamshedpur, India; abhilash@nmlindia.org (A.)

<sup>2</sup> Department of Separation Science, Lappeenranta-Lahti University of Technology (LUT), Lappeenranta, Finland; sami.virolainen@lut.fi (S.V.); tuomo.sainio@lut.fi (T.S.)

\* Correspondence: pratima@nmlindia.org; Tel.: +916572345277

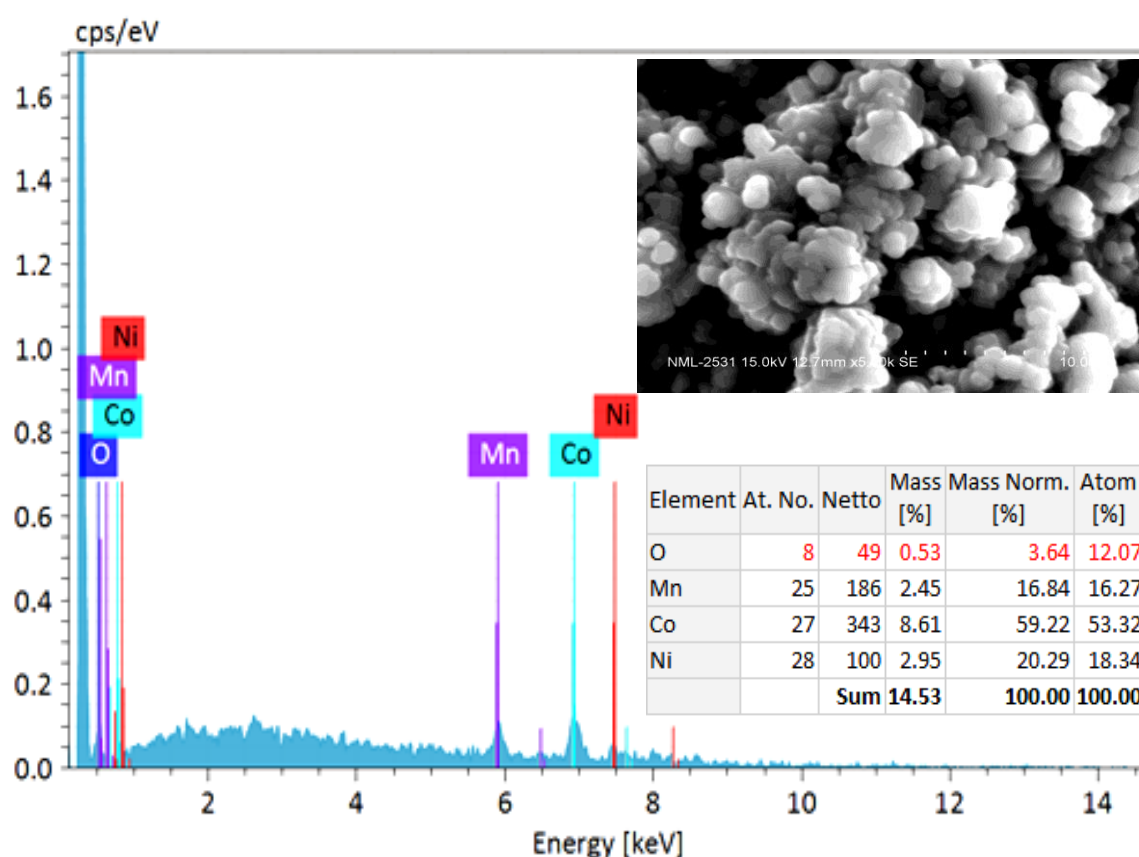

Figure S1. SEM-EDS analysis of the cathode powder of spent LIBs.

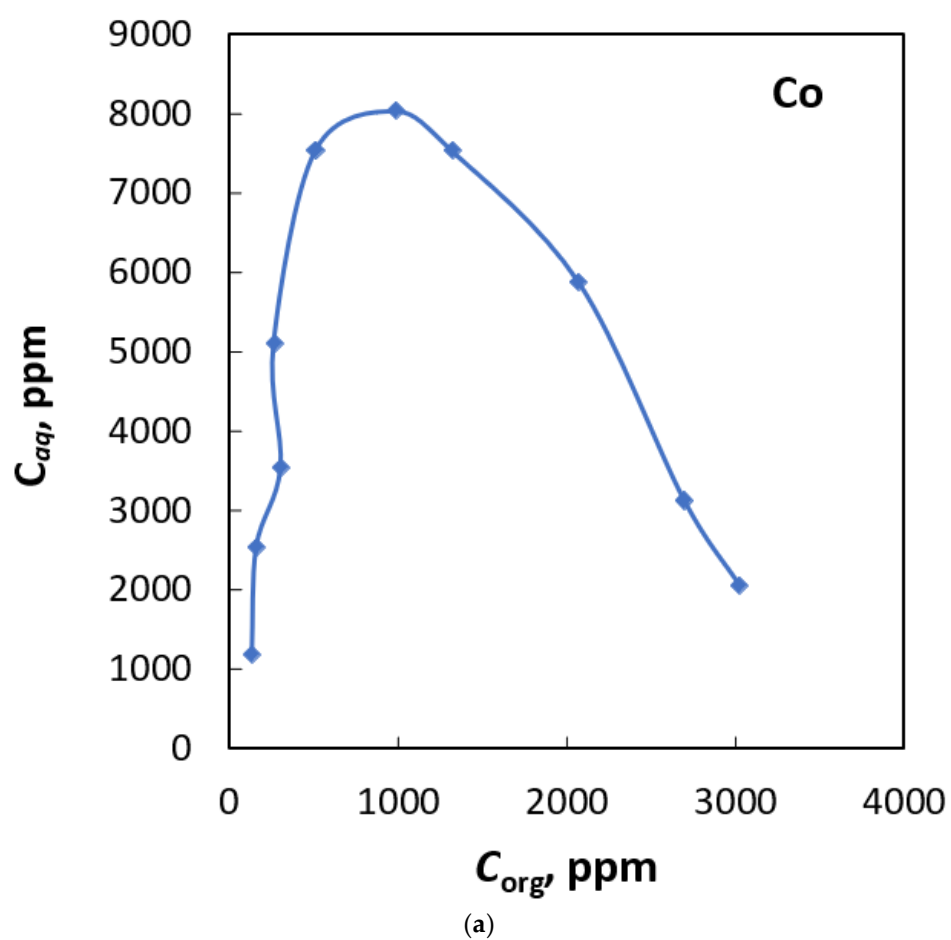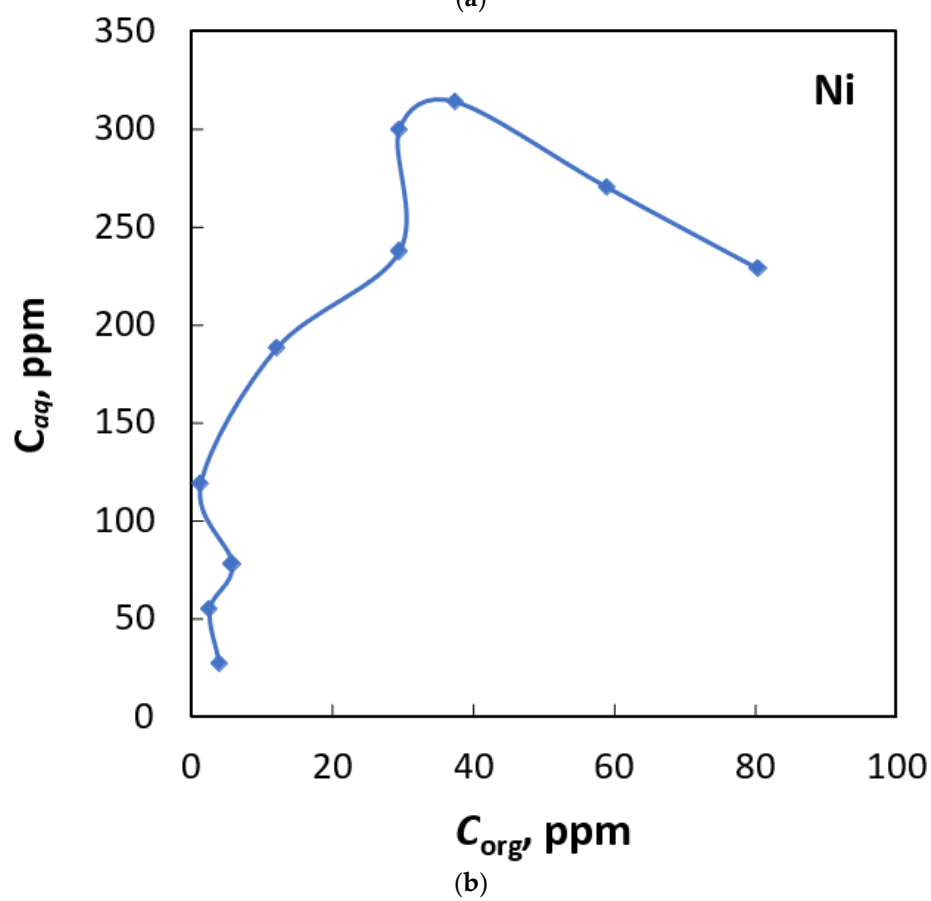

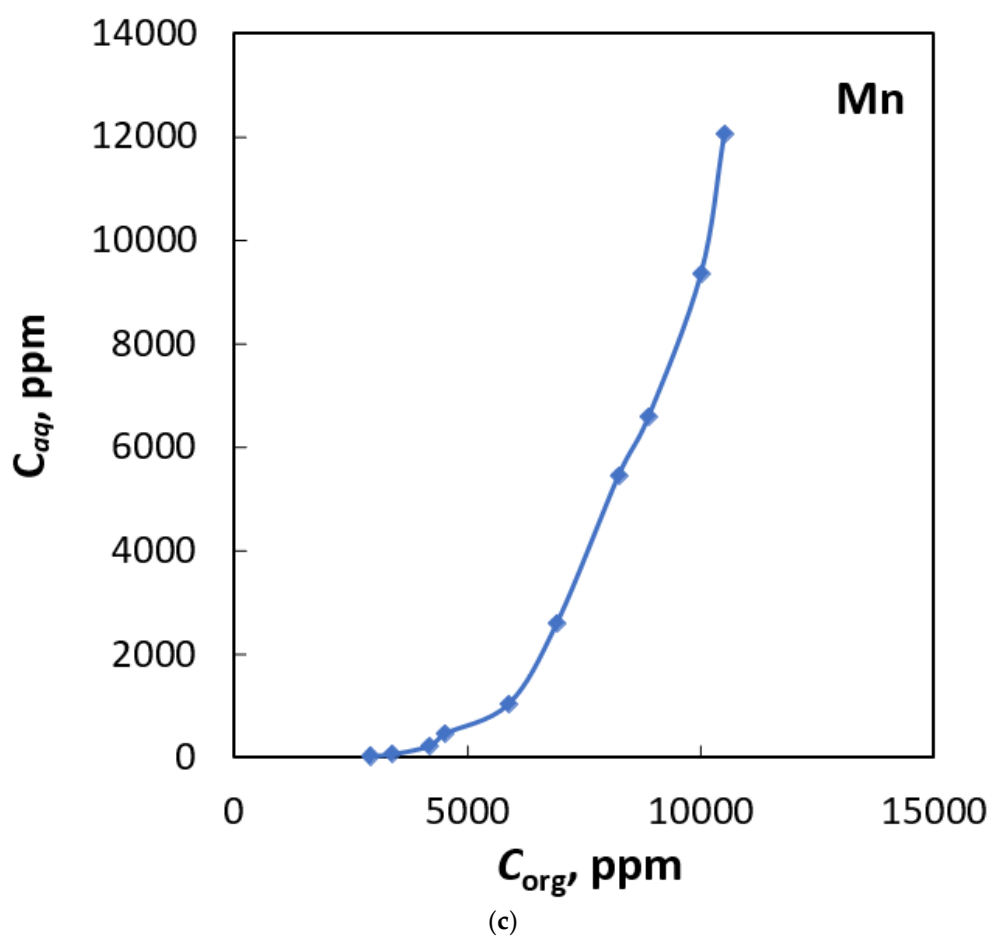

**Figure S2.** Scrubbing isotherms of Co, Ni and Mn using Mn solution at 35 °C.
